# Supplementary material for: Seed Dispersal Anachronisms: Rethinking the Fruits Extinct Megafauna Ate
Source: PLoS One. 2008 Mar 5;3(3):e1745. doi: 10.1371/journal.pone.0001745 (PMC2258420; doi:10.1371/journal.pone.0001745)
Supplement: Table S1 — Fruit characteristics of megafauna-dependent species. (0.07 MB XLS) [file pone.0001745.s001.xls]

## Sheet: Dataset
FAM	GEN	SP	COD	LENG	DIAM	FRFM	SEEDS	SEEDM	SDM	SLENG	SDIAM	SHEIGHT	FCOLOR	FRUIT TYPE	RANGE	MAINVEG	CANOPY	SITE	TYPE	USAGE BY HUMANS	HYDROCHORY	VEGT
ACHARIACEAE	Carpotroche	brasiliensis	CBRS	130.00	110.00		100.0	0.66	66.00	1.8	1.25		GREEN	BERRY-LIKE	2	ATL	MIXED	RIVER	2
ANACARDIACEAE	Anacardium	giganteum	AGI	65.00	42.5		1.0			2.5			RED	DRUPE AND PSEUDOFRUIT	2	AMAZON	MIXED	RIVER	1	1		1(?)
ANACARDIACEAE	Anacardium	occidentale	AOC	90.00	40.00	60.0	1.0	4.1	4.1	3.00	2.00		RED/YELLOW	DRUPE AND PSEUDOFRUIT	2	MIXED	OPEN	TERRA	1	3		1
ANACARDIACEAE	Poupartia	amazonica	PAMA	45.00	25.00	35.0							YELLOW	DRUPE	1	AMAZON	CLOSE	TERRA	1	1
ANACARDIACEAE	Spondias	tuberosa	STUB	45.00	38.00		1.0	2.04	2.04	2.8	2.00		GREEN-YELLOW	DRUPE	2	CAAT	OPEN	TERRA	1	2	1
ANNONACEAE	Annona	cacans	ACA	120.00	100.00		150.0	0.2	200.00	1.5	0.8		GREEN	SYNCARP	3	ATL	MIXED	RIVER	2	1	1
ANNONACEAE	Annona	coriacea	ACOR	120.00	110.00		150.0	0.69	690.00	1.5	1.00		GREEN	SYNCARP	2	CERR	OPEN	TERRA	2	2	1
ANNONACEAE	Annona	crassiflora	ACR	140.00	150.00	1600.0	150.0	0.67	670.00	1.5	1.00		BROWN	SYNCARP	2	CERR	MIXED	TERRA	2	2		1
ANNONACEAE	Annona	densicoma	ADE	100.00	70.00		90.0							SYNCARP		AMAZON	OPEN	TERRA	2	1
ANNONACEAE	Annona	montana	AMO	160.00	110.00		150.0							SYNCARP	4	MIXED	OPEN	TERRA	2	2
ANNONACEAE	Annona	muricata	AMU	120.00	80.00	1725.0	90.0			1.7			GREEN	SYNCARP	4				2	3
ANNONACEAE	Rollinia	mucosa	RMUC	150.00	135.00	800.0	92.0	0.3	27.6	1.25	0.5		YELLOW	BERRY	3	FOREST	CLOSE	TERRA	2	1		1
APOCYNACEAE	Ambelania	acida	AAC	150.00	60.00		40.0			0.5	0.5		GREEN	BERRY-LIKE	2	AMAZON	OPEN	RIVER	2	1
ARECACEAE	Acrocomia	aculeata	AACU	40.00	42.5	34.0	1.0	28.57	28.57	3.00	3.00		BROWN	DRUPE	3	MIXED	OPEN	TERRA	1	1	1
ARECACEAE	Acrocomia	intumescens	AIN	40.00	40.00	40.0	1.0						GREEN	DRUPE	1	ATL	CLOSE	TERRA	1	1	1
ARECACEAE	Allagoptera	arenaria	AARE	140.00	40.00		2	1.00	2.00				GREEN		2	ATL	OPEN	TERRA	2			1
ARECACEAE	Allagoptera	leucocalyx	ALEU	110.00	35.00		1.5						GREEN		3	CERR	OPEN	TERRA	2
ARECACEAE	Astrocaryum	aculeatissimum	AACL	40.00	35.00	55.6	1.0						BROWN	DRUPE	2	MIXED	MIXED	TERRA	1	1	1
ARECACEAE	Astrocaryum	aculeatum	AACE	50.00	50.00	80.0	1.0	43.00	43.00	4.3	4.3		RED/ORANGE/YELLOW/GREEN-YELLOW/GREEN	DRUPE	2	MIXED	MIXED	TERRA	1	1	1
ARECACEAE	Astrocaryum	murumuru	AMR	57.5	32.5	20.0	1.0						BROWN	DRUPE	2	AMAZON	MIXED	RIVER	1	1	1
ARECACEAE	Astrocaryum	vulgare	AVU	50.00	30.00		1.0	15.00	15.00	3.5	2.5		ORANGE	DRUPE	2	AMAZON	OPEN	TERRA	1	2	1	1
ARECACEAE	Attalea	dahlgreniana	ADA	75.00	40.00	28.6	2.4	26.3	63.12				BROWN	DRUPE	1	FOREST	MIXED	MIXED	1	1
ARECACEAE	Attalea	dubia	ADU	65.00	32.5	33.2	1.5			4.25	2.8		ORANGE	DRUPE	2	ATL	MIXED	TERRA	1	1
ARECACEAE	Attalea	phalerata	APHA	45.00	30.00	36.4	2.5						YELLOW	DRUPE	2	MIXED	OPEN	TERRA	1	1		0
ARECACEAE	Manicaria	saccifera	MSAC	60.00	30.00		2.0	17.8	35.6				BROWN	DRUPE	2	AMAZON	CLOSE	RIVER	1	1
ARECACEAE	Mauritia	carana	MCAR	65.00	50.00		1.0						BROWN - RED	DRUPE	1	AMAZON	MIXED	MIXED	1	1
ARECACEAE	Mauritia	flexuosa	MFLE	57.5	57.5	32.5	1.0	23.8	23.8	3.5	2.5		BROWN - RED	DRUPE	2	MIXED	MIXED	RIVER	1	1
ARECACEAE	Maximiliana	maripa	MMAR	55.00	40.00	12.2	2.5	6.25	15.63	4.00	2.00		YELLOW	DRUPE	2	AMAZON	OPEN	TERRA	1	2
ARECACEAE	Polyandrococos	caudescens	PCAU	50.00	30.00		1.0	6.45	6.45	4.00	2.8		ORANGE	DRUPE	1	ATL	MIXED	TERRA	1
ARECACEAE	Syagrus	cearensis	SCEA	45.00	45.00		1.0	20.00	20.00				BROWN	DRUPE	1	SAND	OPEN	TERRA	1	1
ARECACEAE	Syagrus	cocoides	SCOC	42.5	22.5		1.0						GREEN	DRUPE	2	MIXED	OPEN	TERRA	1	1
ARECACEAE	Syagrus	macrocarpa	SMAC	65.00	35.00		1.0	16.67	16.67				GREEN-YELLOW	DRUPE	1	MIXED	MIXED	TERRA	1
ARECACEAE	Syagrus	oleracea	SOLE	42.5	32.5	16.7	1.0	14.3	14.3	4.00	2.8		GREEN-YELLOW	DRUPE	2	MIXED	MIXED	TERRA	1	1
ARECACEAE	Syagrus	picrophylla	SPI	40.00	27.5		1.0						GREEN-YELLOW	DRUPE	1	ATL		TERRA	1	1
ARECACEAE	Syagrus	pseudococos	SPSE	65.00	35.00	33.3	1.0						GREEN-YELLOW	DRUPE	1	ATL	MIXED	TERRA	1
BROMELIACEAE	Ananas	ananassoides	AAN	160.00			1000.0			0.4	0.25		GREEN-GRAY	PINEAPPLE	3	CERR	OPEN	TERRA	2	2		1
BROMELIACEAE	Ananas	comosus	ACO	250.00		2200.0	1000.0						ORANGE	PINEAPPLE	4	MIXED	OPEN	TERRA	2	3		1
CARYOCARACEAE	Caryocar	brasiliense	CBRA	70.00	60.00		2.5	6.9	17.25	4.5	3.00		GREEN/YELLOW	DRUPE	2	CERR	OPEN	TERRA	1	2	1	1
CARYOCARACEAE	Caryocar	microcarpum	CMI	75.00	75.00		2.5			2.75			BROWN	DRUPE	2	AMAZON		RIVER	1	1
CARYOCARACEAE	Caryocar	villosum	CVI	100.00	90.00	550.0	2.5	31.2	78.00	5.00	4.00		BROWN	DRUPE	2	AMAZON	CLOSE	MIXED	1	2	1	1
CELASTRACEAE	Salacia	crassifolia	SCA	44.00	31.5		2.0	1.8	3.6	1.65	1.25		YELLOW	BERRY-LIKE	2	CERR	MIXED	TERRA	1	1		1
CHRYSOBALANACEAE	Couepia	bracteosa	CBR	115.00	100.00		1.0			6.00	5.00		BROWN	DRUPE	2	AMAZON	MIXED	TERRA	1	1
CHRYSOBALANACEAE	Couepia	subcordata	CSU	70.00	30.00		1.0			6.00	2.00			DRUPE					1	1
CHRYSOBALANACEAE	Licania	tomentosa	LTOM	77.5	35.00		1.0	11.9	11.9	5.00	2.5		ORANGE	DRUPE	1	ATL	MIXED	TERRA	1	1
CHRYSOBALANACEAE	Parinari	montana	PMON	115.00	135.00	1200.0	1.0	140.00	140.00	9.00	7.00	4.5	BROWN	DRUPE	2	AMAZON	CLOSE	TERRA	1	1
CLUSIACEAE	Platonia	insignis	PINS	110.00	100.00	450.0	3.0	18.18	54.54	5.00	1.5		YELLOW-GREEN	BERRY-LIKE	2	MIXED	OPEN	MIXED	1	2
CLUSIACEAE	Rheedia	acuminata	RACU	60.00	50.00	70.0	2.0	4.2	8.4	3.00	1.3	1.00	YELLOW	BERRY-LIKE	2	MIXED	MIXED	MIXED	1	1
CLUSIACEAE	Rheedia	macrophylla	RMA	65.00	50.00	65.0	3.2						YELLOW	BERRY-LIKE	2	AMAZON	CLOSE	MIXED	1	2
FABACEAE	Andira	anthelmia	AANT	45.00	32.5	16.7	1.0			3.75	3.00		GREEN	DRUPE	2	ATL	MIXED		1
FABACEAE	Andira	humilis	AHU	50.00	0.00		1.0	19.00	19.00	1.75	1.13		YELLOW	DRUPE	2	CERR	OPEN	TERRA	1			1
FABACEAE	Andira	legalis	ALEG	65.00	40.00	12.0	1.0			5.5	3.00		GREEN	DRUPE	1	ATL	MIXED	RIVER	1			1
FABACEAE	Cassia	leiandra	CLE	600.00	25.00	325.0	90.0	1.00	90.00	1.6	2.00	0.6	GREEN-YELLOW	LEGUME	2	AMAZON		MIXED	1	1
FABACEAE	Dipteryx	alata	DALA	65.00	30.00	33.3	1.0			2.8	1.00		BROWN	DRUPE	2	MIXED	MIXED	TERRA	1	1
FABACEAE	Dipteryx	odorata	DOD	57.5	30.00	12.0	1.0			3.25	1.00		BROWN	DRUPE-LIKE LEGUME	2	AMAZON	CLOSE	MIXED	1	1
FABACEAE	Geoffroea	striata	GST	45.00	25.00		1.0			3.5	2.8		GREEN	DRUPE-LIKE LEGUME	3	MIXED		RIVER	1	1
FABACEAE	Hymenaea	courbaril	HCOU	105.00	35.00	125.0	4.5	4.00	18.00	2.8	1.8		BROWN	LEGUME	4	MIXED	CLOSE	TERRA	1	1	1
FABACEAE	Hymenaea	stigonocarpa	HSTI	100.00	35.00		4.5	3.13	14.06	2.00	1.5		BROWN	LEGUME	2	MIXED	OPEN	TERRA	1	1
FABACEAE	Inga	alba	IALB	160.00	20.00		13.0						GREEN	LEGUME	3	AMAZON	MIXED	TERRA	1	1
FABACEAE	Inga	cinnamomea	ICIN	250.00	20.00	357.5	12.5	5.00	62.5	3.3	1.5	1.3	GREEN	LEGUME	2	AMAZON		RIVER	1	1
FABACEAE	Inga	edulis	IEDU	750.00	35.00		15.0			3.25	2.00		GREEN	LEGUME	4	FOREST	OPEN	RIVER	1	1
FABACEAE	Inga	fagifolia	IFAG	40.00	25.00									LEGUME	4	MIXED	MIXED	TERRA	1	1
FABACEAE	Inga	falcistipula	IFAL	80.00	25.00									LEGUME	2	AMAZON	MIXED	TERRA	1	1
FABACEAE	Inga	heterophyla	IHET	80.00	13.00								GREEN-YELLOW	LEGUME	4	MIXED	MIXED	TERRA	1	1
FABACEAE	Inga	laurina	ILAU	150.00	25.00			1.9					YELLOW	LEGUME	4	MIXED	MIXED	RIVER	1	1
FABACEAE	Inga	macrophylla	IMAC	375.00	55.00		9.0			3.00			GREEN	LEGUME	2				1	1
FABACEAE	Inga	marginata	IMAR	105.00	10.00		11.0	1.5	16.5	1.00	0.5		GREEN	LEGUME	4	FOREST	OPEN	MIXED	1	2
FABACEAE	Inga	sessilis	ISES	150.00	25.00		15.0	2.2	33.00	1.5	0.8		BROWN	LEGUME	2	FOREST	CLOSE	RIVER	1	1
FABACEAE	Inga	thibaudiana	ITHI	128.00	22.5					1.3			FERRUGEM	LEGUME	4				1	1
FABACEAE	Inga	velutina	IVEL	216.00	40.00					1.5			BROWN - RED	LEGUME	2	AMAZON			1	1
FABACEAE	Swartzia	langsdorfii	SLAN	110.00	55.00		1.0	40.00		3.25	2.5		YELLOW	DRUPE-LIKE LEGUME	1	ATL	CLOSE		1
FABACEAE	Swartzia	macrostachya	SMA	80.00	30.00			1.4		2.5	1.5		BROWN	DRUPE-LIKE LEGUME	2	MIXED	MIXED	MIXED	1
FABACEAE	Swartzia	oblata	SOB	110.00	50.00		2.0	12.5	25.00	3.8	2.8		GREEN-YELLOW	LEGUME	1	ATL	CLOSE	MIXED	1
HUMIRIACEAE	Duckesia	verrucosa	DVER	70.00	70.00		2.0						greenish	DRUPE-LIKE	1	AMAZON	CLOSE	TERRA	1	1
HUMIRIACEAE	Endopleura	uchi	EUCHI	60.00	35.00	60.0	2.0			2.5	0.7		greenish / BROWN	DRUPE-LIKE	2	AMAZON	CLOSE	TERRA	1	1
ICACINACEAE	Poraqueiba	paraensis	PPAR	70.00	40.00								YELLOW OR PURPLE	DRUPE	1	AMAZON	MIXED	TERRA	1	2
ICACINACEAE	Poraqueiba	sericea	PSER	75.00	47.5	110.0	1.0			5.00			PURPLE	DRUPE	2	AMAZON	CLOSE	TERRA	1	1
LECYTHIDACEAE	Couroupita	guianensis	CGU	210.00	200.00			0.28		1.25	1.25		BROWN	DISTINCT, MULTI-SEEDED FRUIT	2	AMAZON		RIVER	2
MALVACEAE	Quararibea	cordata	QCOR	120.00	100.00	850.0	4.0			4.5	1.3	2.05	BROWN	BERRY-LIKE	3	AMAZON	CLOSE	TERRA	1	1
MALVACEAE	Theobroma	bicolor	TBIC	240.00	96.00	1000.0	47.5	4.00	190.00	2.9	2.3	1.00	YELLOW	BERRY-LIKE	4	AMAZON	MIXED		2	3
MALVACEAE	Theobroma	cacao	TCAC	200.00	135.00		50.0	4.7	4700.00	2.5	1.25		VARIABLE	BERRY-LIKE	3	AMAZON	CLOSE	TERRA	2	3		1
MALVACEAE	Theobroma	grandiflorum	TGRA	250.00	120.00	2750.0	32.5	5.5	178.75	2.5	2.25	1.4	BROWN	BERRY-LIKE	2	AMAZON	CLOSE	TERRA	2	3		1
MALVACEAE	Theobroma	obovatum	TOBO	90.00	55.00		14.5						YELLOW	BERRY-LIKE	2	AMAZON		TERRA	?	1		?
MALVACEAE	Theobroma	subincanum	TSUB	90.00	60.00	200.0	27.5			1.8	1.4		YELLOW	BERRY-LIKE	2	AMAZON	CLOSE	RAIN	?	1
MYRTACEAE	Eugenia	cambucarana	ECAM	36.5	41.2		1.0			2.83	2.84			BERRY-LIKE					1
MYRTACEAE	Eugenia	klotzschiana	EKL	77.5			2.5	3.03	7.58				YELLOW	BERRY-LIKE	1	CERR	OPEN	TERRA	1	1
MYRTACEAE	Eugenia	neoverrucosa	ENEO	43.7	46.7		1.0			3.05	2.91			BERRY-LIKE					1
MYRTACEAE	Eugenia	stipitata	ESTI	75.00	85.00	425.0	9.0			2.5			YELLOW	BERRY-LIKE	2	AMAZON			1	2
QUIINACEAE	Lacunaria	grandiflora	LGR	120.00	78.00									BERRY-LIKE	2				?	1
QUIINACEAE	Lacunaria	jemmani	LJE	100.00	65.00									BERRY-LIKE	2	AMAZON	MIXED	TERRA	?	1
RUBIACEAE	Genipa	americana	GAMA	115.00	75.00	350.0	200.0	0.07	33.6	0.65	0.6	0.2	BROWN	BERRY-LIKE	4	MIXED	CLOSE	RIVER	2	2
SAPOTACEAE	Achras	sapota	ASA	75.00	75.00		2.5			2.25	2.25		BROWN - RED	BERRY					1	1
SAPOTACEAE	Pouteria	caimito	PCAI	80.00	60.00	200.0	2.5	3.5	8.75	3.5	1.5	1.4	YELLOW	BERRY-LIKE	3	FOREST	CLOSE	MIXED	1	3		1
SAPOTACEAE	Pouteria	grandiflora	PGR	75.00	75.00		2.5	22.2	55.5	3.25	2.8		BROWN	BERRY-LIKE	1	ATL	CLOSE		1	1
SAPOTACEAE	Pouteria	macrocarpa	PMA	100.00	100.00								YELLOW-GREEN	BERRY		AMAZON	CLOSE		1	1
SAPOTACEAE	Pouteria	macrophylla	PMAC	40.00	40.00									BERRY	2	AMAZON			1	1
SAPOTACEAE	Pouteria	pachycalyx	PPAC	65.00	60.00		1.5	5.00	7.5	1.5	1.00		REDISH	BERRY-LIKE	1	ATL	MIXED	TERRA	1	1
SAPOTACEAE	Pouteria	pariry	PPA	100.00									GREEN	BERRY	2	AMAZON	CLOSE	TERRA	1	1
SAPOTACEAE	Pouteria	ramiflora	PRA	44.5	39.5		1.0	1.5	1.5	2.6	1.6		GREEN	BERRY-LIKE	2	MIXED	MIXED	TERRA	1	1		1
SAPOTACEAE	Pouteria	speciosa	PSP	110.00									PURPLE	DRUPE	1	AMAZON	CLOSE	TERRA	1	1
SAPOTACEAE	Pouteria	torta	PTOR	60.00	32.5		1.0	3.03	3.03	2.8	1.5		YELLOW	BERRY-LIKE	3	MIXED	CLOSE	RIVER	1	1
SAPOTACEAE	Pouteria	venosa	PVEN	60.00	60.00		2.0	25.00	50.00	4.5	3.5		BROWN	BERRY-LIKE	4	FOREST	CLOSE	TERRA	1	1
SOLANACEAE	Duckeodendron	cestroides	DCES	58.00	32.5		1.0	13.33	13.33	5.5	3.25		ORANGE	DRUPE	2	AMAZON	CLOSE	TERRA	1
SOLANACEAE	Solanum	lycocarpum	SLIC	115.00	90.00		700.0	0.02	15.22	0.2	0.2		GREEN	BERRY-LIKE	3	CERR	OPEN	TERRA	2	1

## Sheet: Columns codes
Code	Description
FAM	Family
GEN	Genus
SP	Species
COD	Species code
LENG	Fruit length (mm)
DIAM	Fruit diameter (mm)
FRFM	fresh fruit mass (g)
SEEDS	Number of seeds per fruit
SEEDM	Seed mass (g)
SDM	Seed mass(g) per fruit
SLENG	Seed length (cm)
SDIAM	Seed diameter (cm)
SHEIGHT	Seed height (cm)
FCOLOR	Fruit color
FRUIT TYPE	Fruit type
RANGE	Geographic range
MAINVEG	Main vegetation type
CANOPY	Type of forest canopy
SITE	Type of forest site
TYPE	Fruit type, according to Feer's criteria of Type I and Type II elephant fruits
USAGE BY HUMANS	Type of use by humans
HYDRO	Evidence of hidrocory
VEGT	Vegetative resprouting
	Nomenclature follows Stevens, P. F. (2001 onwards). Angiosperm Phylogeny Website. Version 8, June 2007. http://www.mobot.org/MOBOT/research/APweb/
	This scheme follows: A.P.G. [= Angiosperm Phylogeny Group] II. 2003. An update of the Angiosperm Phylogeny Group classification for the orders and families of flowering plants: APG II. Bot. J. Linnean Soc. 141: 399-436.
	NOTE: the number of seeds/fruit (SEEDS) has been estimated for Annona species as 150/fruit for the large-fruited species and 90 seeds/fruit for the smaller-fruited species. For Ananas we set SEEDS to 1000.
